# Supplementary material for: Fused multicyclic polyketides with a two-spiro-carbon skeleton from mangrove-derived endophytic fungus Epicoccum nigrum SCNU-F0002
Source: Royal Society of Chemistry journal article supplement (doi:10.1039/d0ra05532h), 2020-01-01
Supplement: d0ra05532h1.pdf [file d0ra05532h1.pdf]

**Fused Multicyclic Polyketides with a Two-Spiro-Carbon Skeleton from  
Mangrove-Derived Endophytic Fungus *Epicoccum nigrum* SCNU-F0002**

Zhangyuan Yan<sup>a</sup>, Jialin Li<sup>a</sup>, Geting Ye<sup>a</sup>, Tao Chen<sup>a</sup>, Meimei Li<sup>a</sup>, Yanming Liang<sup>a</sup>,  
Yuhua Long<sup>a</sup>, \*

<sup>a</sup> Z. Yan, J. Lin, G. Ye, T. Chen, M. Li, Y. Liang, Prof. Y. Long

Guangzhou Key Laboratory of Analytical Chemistry for Biomedicine,

School of Chemistry,

South China Normal University,

Guangzhou 510006, China.

\*Corresponding authors. E-mail addresses: [Yuhualong68@hotmail.com](mailto:Yuhualong68@hotmail.com) (Prof. Yuhua Long)

## Contents

|                                                                                                                             |    |
|-----------------------------------------------------------------------------------------------------------------------------|----|
| <b>Fig.S1.</b> HR-ESI-MS spectrum of ( $\pm$ 1) .....                                                                       | 3  |
| <b>Fig.S2.</b> $^1\text{H}$ - NMR spectrum (DMSO, 600MHz) of ( $\pm$ 1) .....                                               | 3  |
| <b>Fig.S3.</b> DEPT 135 and $^{13}\text{C}$ -NMR spectrum (DMSO, 600MHz) of compound ( $\pm$ 1) .....                       | 4  |
| <b>Fig.S4.</b> $^1\text{H}$ - $^1\text{H}$ COSY spectrum (DMSO, 600MHz) of compound ( $\pm$ 1) .....                        | 4  |
| <b>Fig.S5.</b> HSQC spectrum (DMSO, 600MHz) of compound ( $\pm$ 1) .....                                                    | 5  |
| <b>Fig.S6.</b> HMBC spectrum (DMSO, 600MHz) of compound ( $\pm$ 1) .....                                                    | 5  |
| <b>Fig.S7.</b> NOESY spectrum of (DMSO, 600MHz) compound ( $\pm$ 1) .....                                                   | 6  |
| <b>Fig.S8.</b> UV spectrum of (+)- <b>1</b> in MeOH .....                                                                   | 6  |
| <b>Fig.S9.</b> Experimental ECD spectrum of (+)- <b>1</b> .....                                                             | 7  |
| <b>Fig.S11.</b> Experimental ECD spectrum of (-)- <b>1</b> .....                                                            | 8  |
| <b>Fig.S12.</b> IR spectrum of compound ( $\pm$ 1) .....                                                                    | 8  |
| <b>Fig.S13.</b> HR-ESI-MS spectrum of compound ( <b>2</b> ) .....                                                           | 9  |
| <b>Fig.S14.</b> $^1\text{H}$ - NMR spectrum ( $\text{CD}_3\text{OD}$ , 600MHz) of compound ( <b>4</b> ) .....               | 9  |
| <b>Fig.S15.</b> DEPT 135 and $^{13}\text{C}$ -NMR spectrum ( $\text{CD}_3\text{OD}$ , 150MHz) of compound ( <b>4</b> ) ..   | 10 |
| <b>Fig.S16.</b> $^1\text{H}$ - $^1\text{H}$ COSY spectrum ( $\text{CD}_3\text{OD}$ , 600MHz) of compound ( <b>4</b> ) ..... | 10 |
| <b>Fig.S17.</b> HSQC spectrum ( $\text{CD}_3\text{OD}$ , 600MHz) of compound ( <b>4</b> ) .....                             | 11 |
| <b>Fig.S18.</b> HMBC spectrum ( $\text{CD}_3\text{OD}$ , 600MHz) of compound ( <b>2</b> ) .....                             | 11 |
| <b>Table S1.</b> deviations in NMR data between natural and synthetic <sup>[1]</sup> samples of <b>1</b> .....              | 12 |
| <b>Table S2.</b> ECD Computational Result .....                                                                             | 12 |

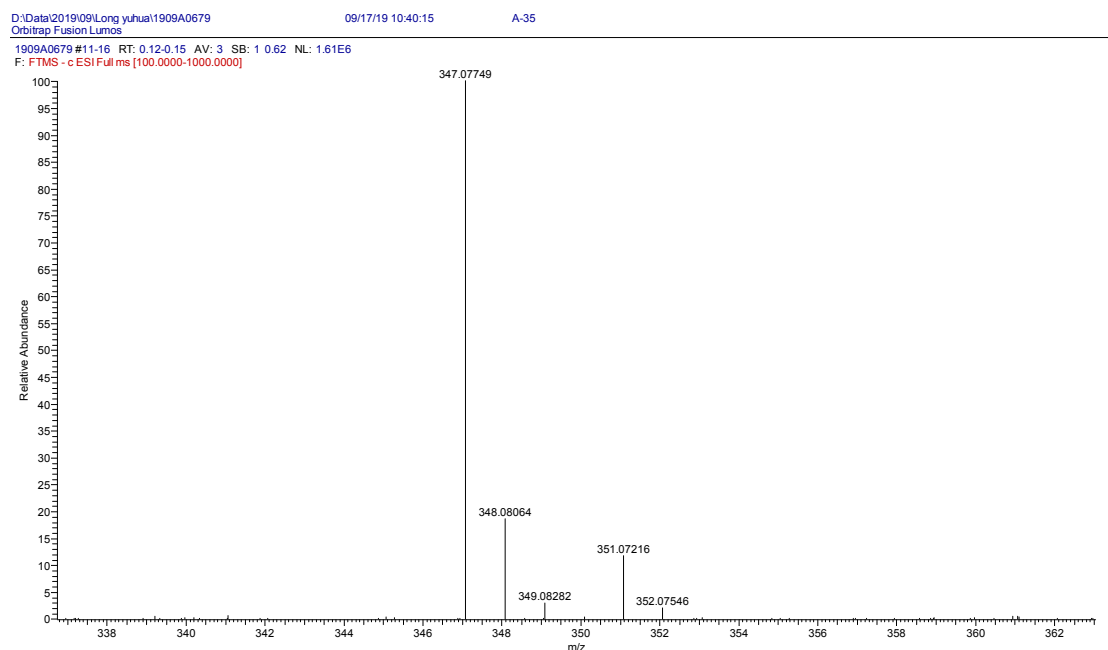

**Fig.S1.** HR-ESI-MS spectrum of ( $\pm 1$ )

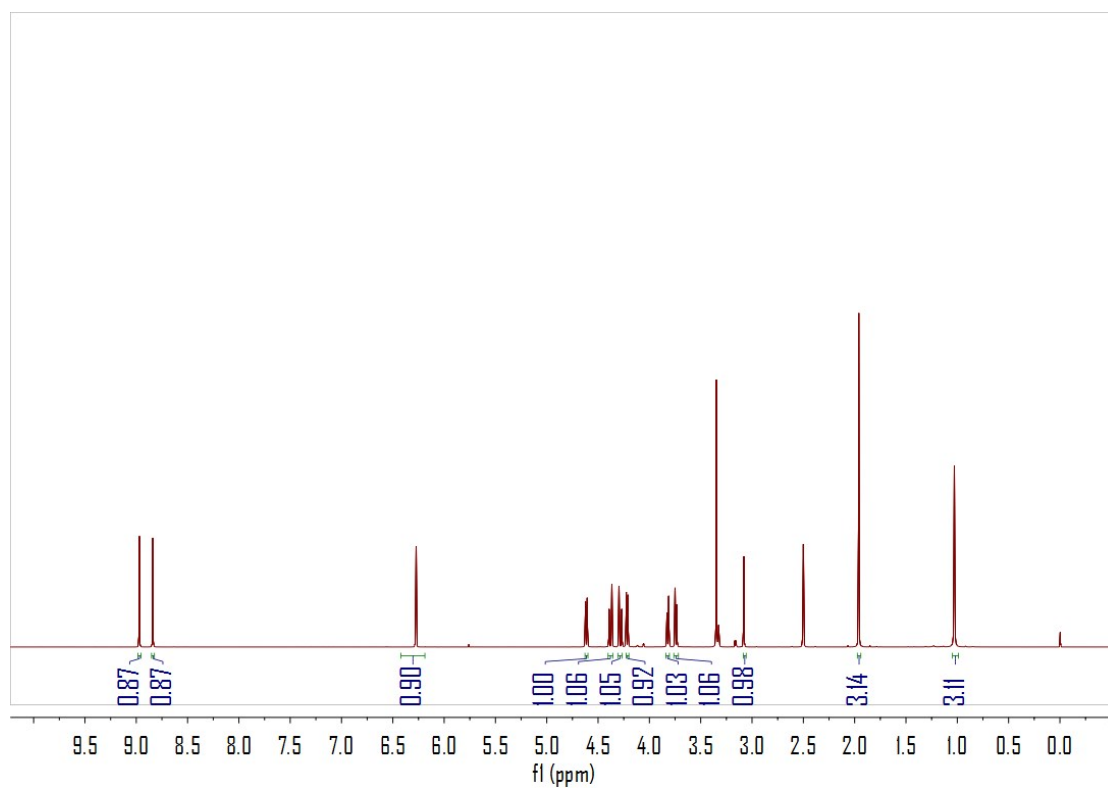

**Fig.S2.**  $^1\text{H}$ -NMR spectrum (DMSO, 600MHz) of ( $\pm 1$ )

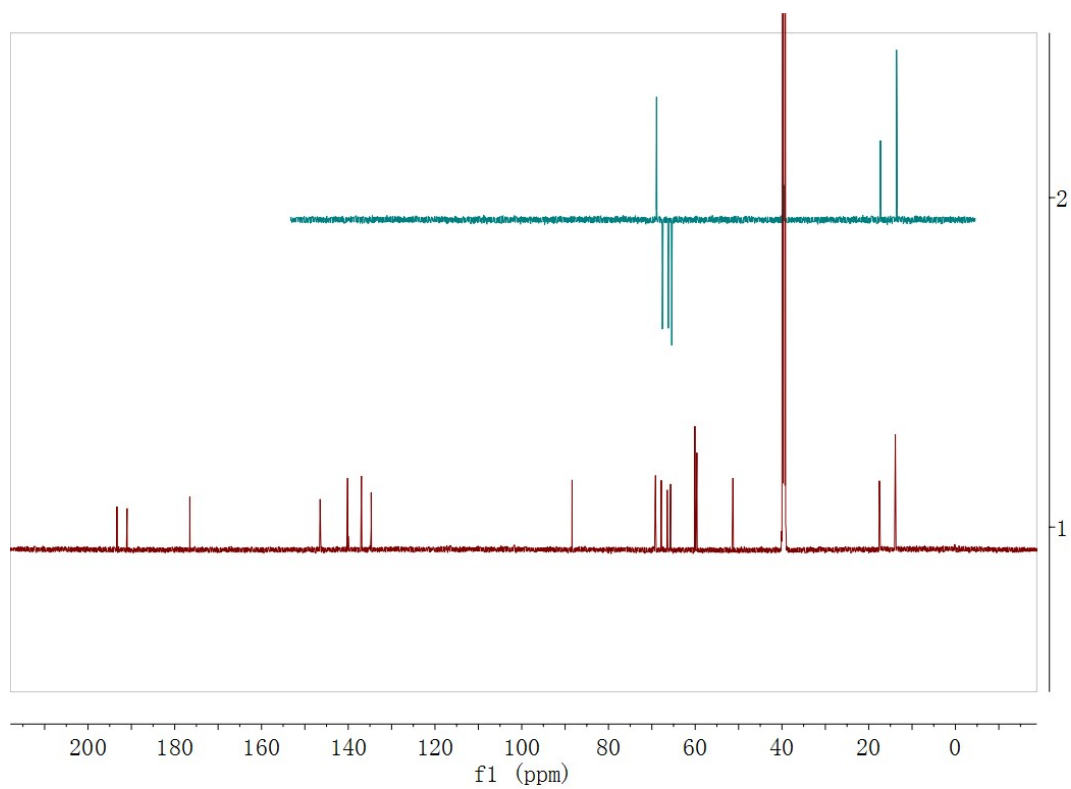

**Fig.S3.** DEPT 135 and <sup>13</sup>C-NMR spectrum (DMSO, 600MHz) of compound (±1)

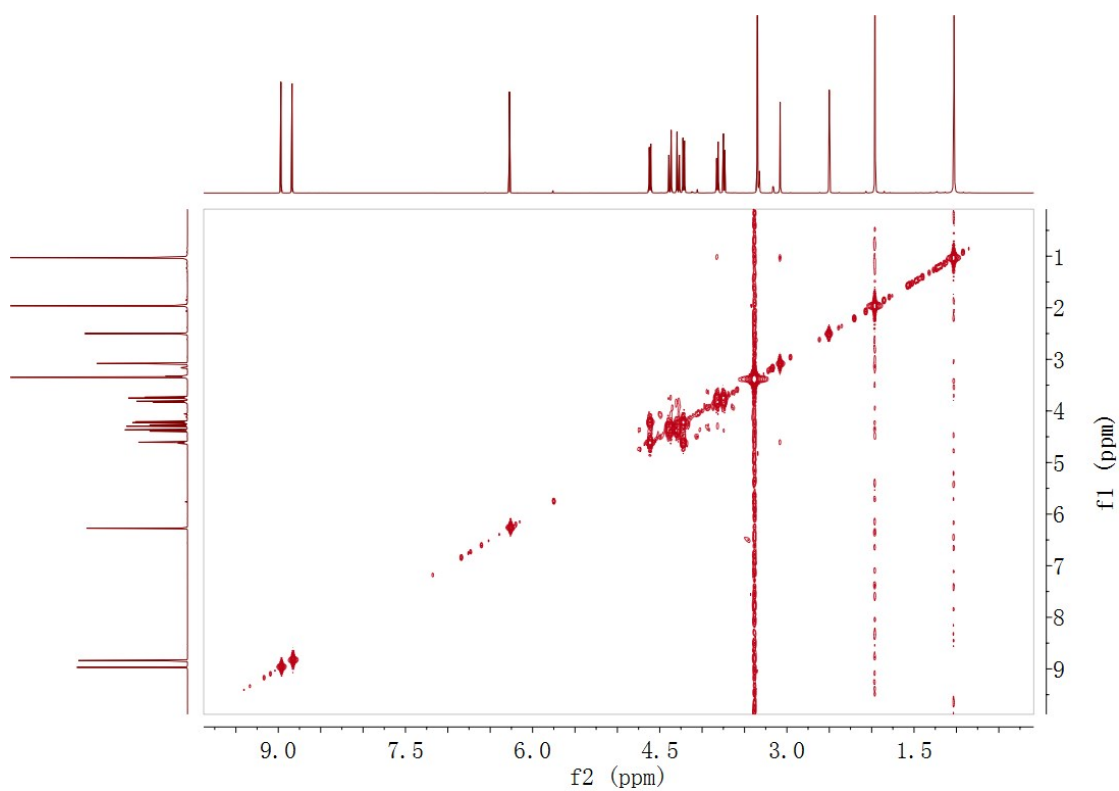

**Fig.S4.** <sup>1</sup>H-<sup>1</sup>H COSY spectrum (DMSO, 600MHz) of compound (±1)

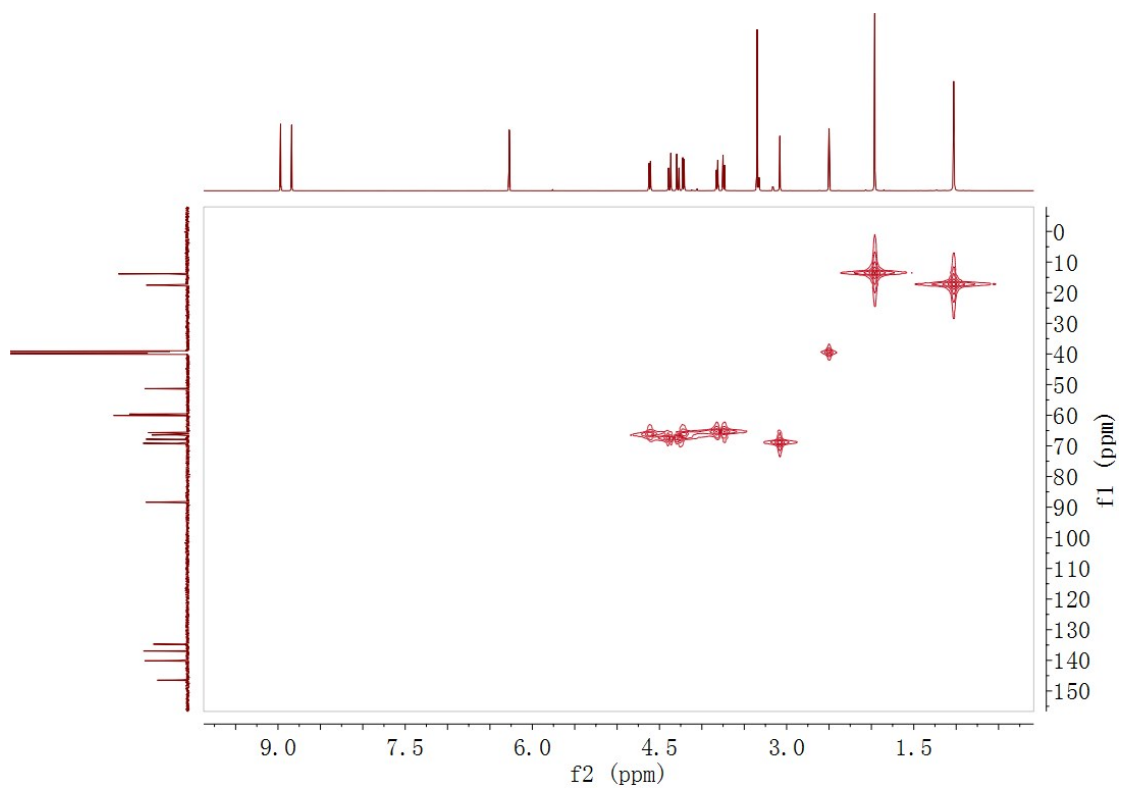

**Fig.S5.** HSQC spectrum (DMSO, 600MHz) of compound ( $\pm 1$ )

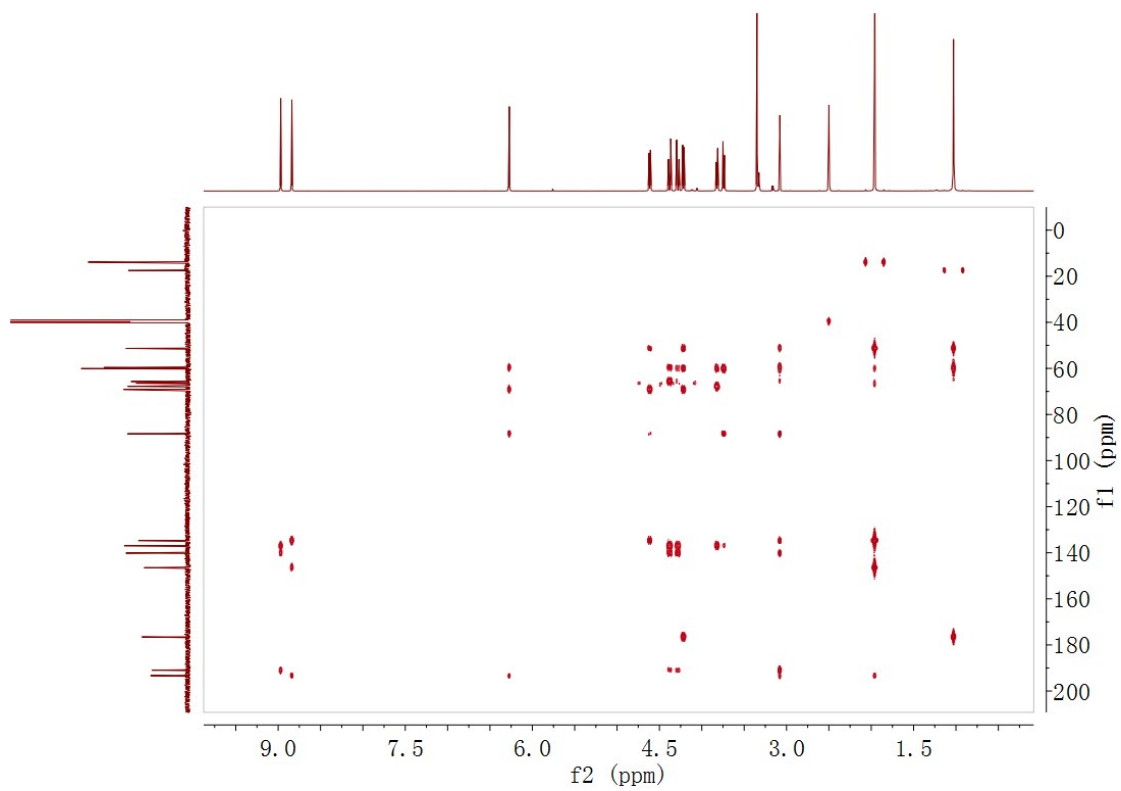

**Fig.S6.** HMBC spectrum (DMSO, 600MHz) of compound ( $\pm 1$ )

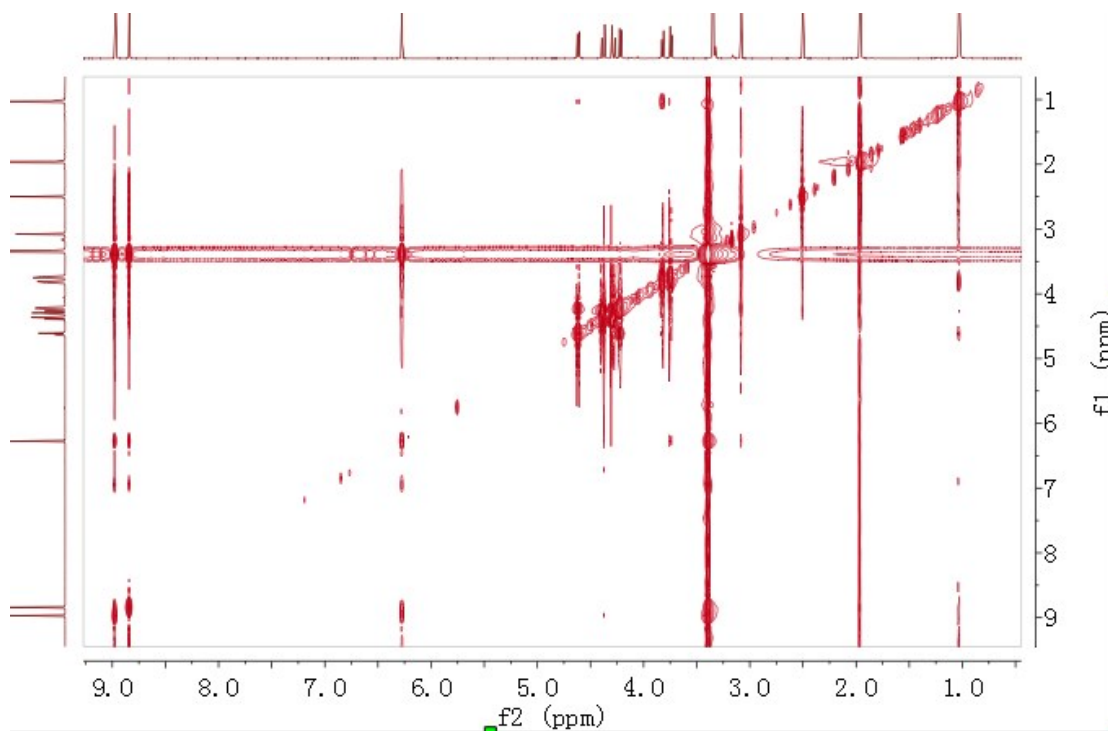

**Fig.S7.** NOESY spectrum of (DMSO, 600MHz) compound ( $\pm 1$ )

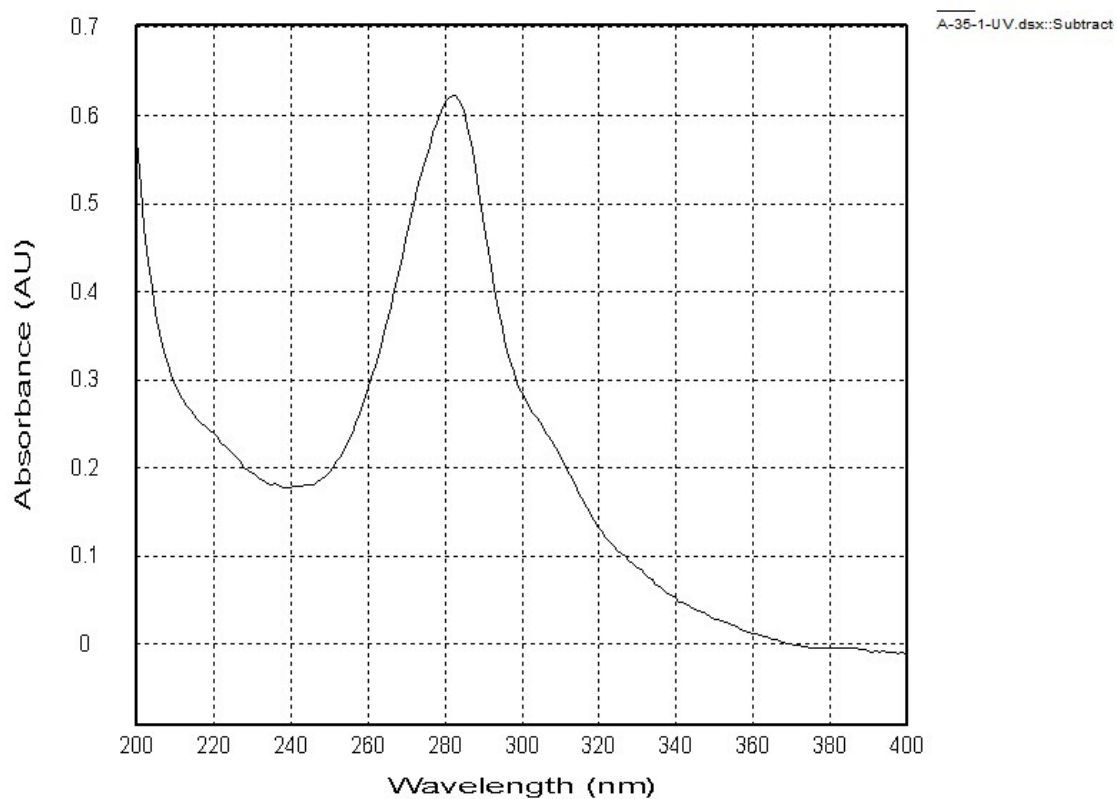

**Fig.S8.** UV spectrum of (+)-1 in MeOH

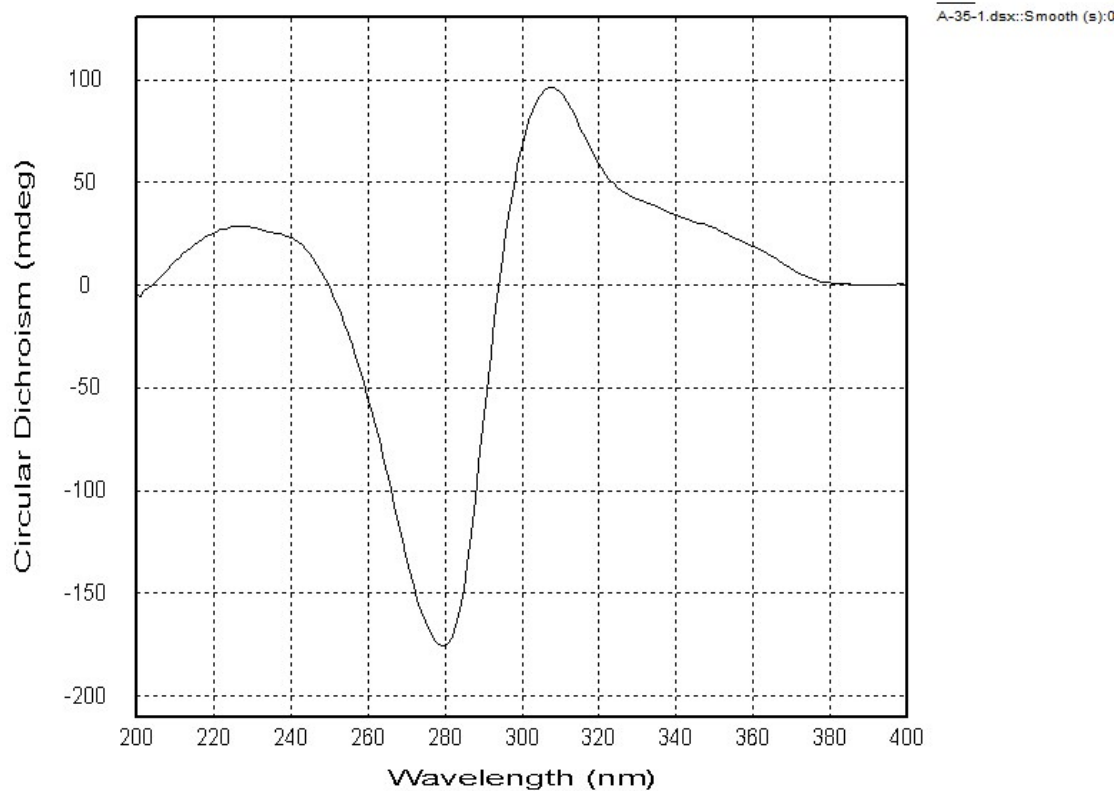

**Fig.S9.** Experimental ECD spectrum of (+)-1

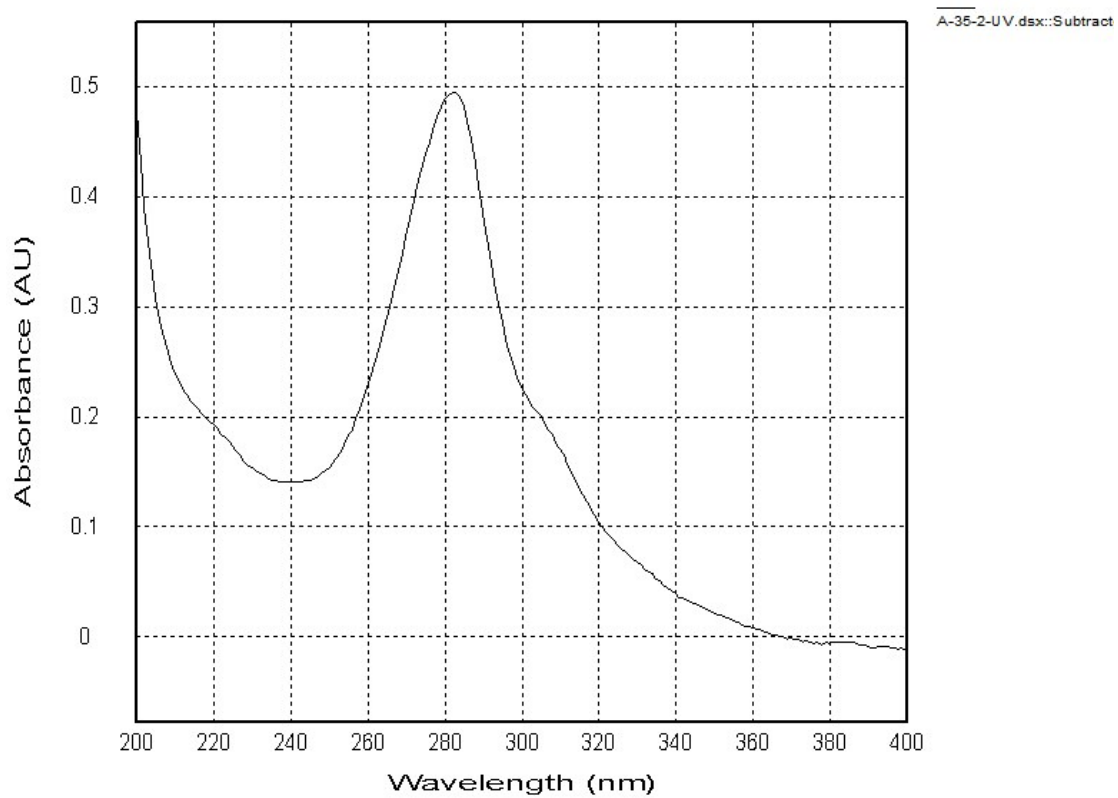

**Fig.S10.** UV spectrum of (-)-1 in MeOH

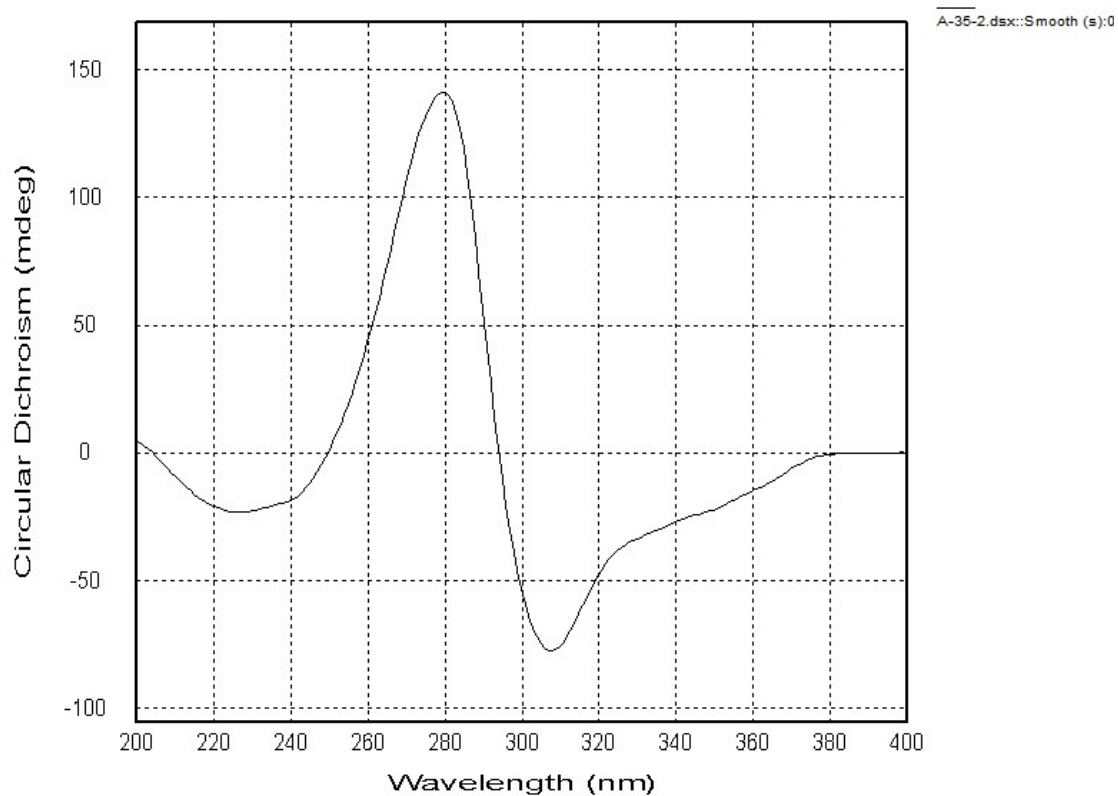

**Fig.S11.** Experimental ECD spectrum of (-)-**1**

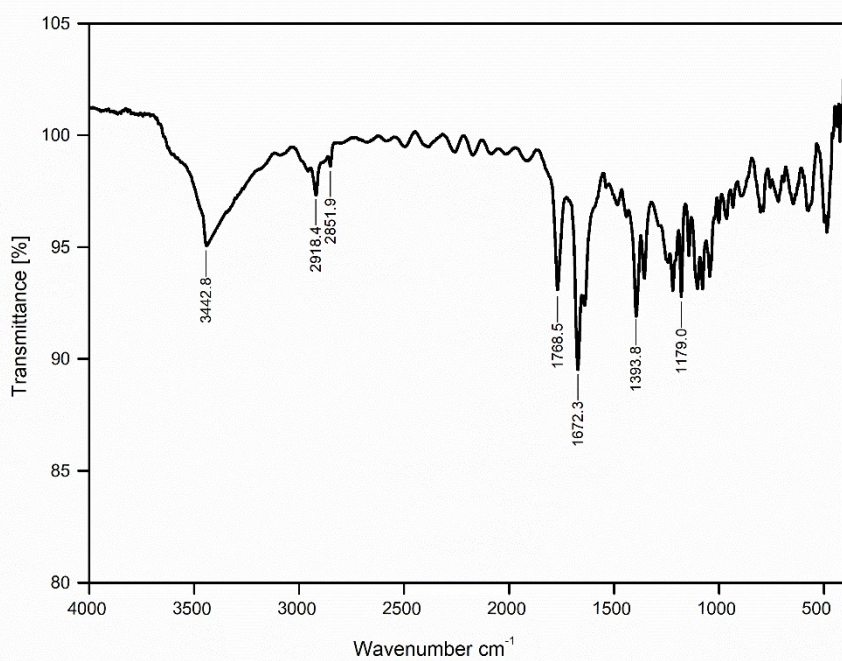

**Fig.S12.** IR spectrum of compound ( $\pm$ )**1**



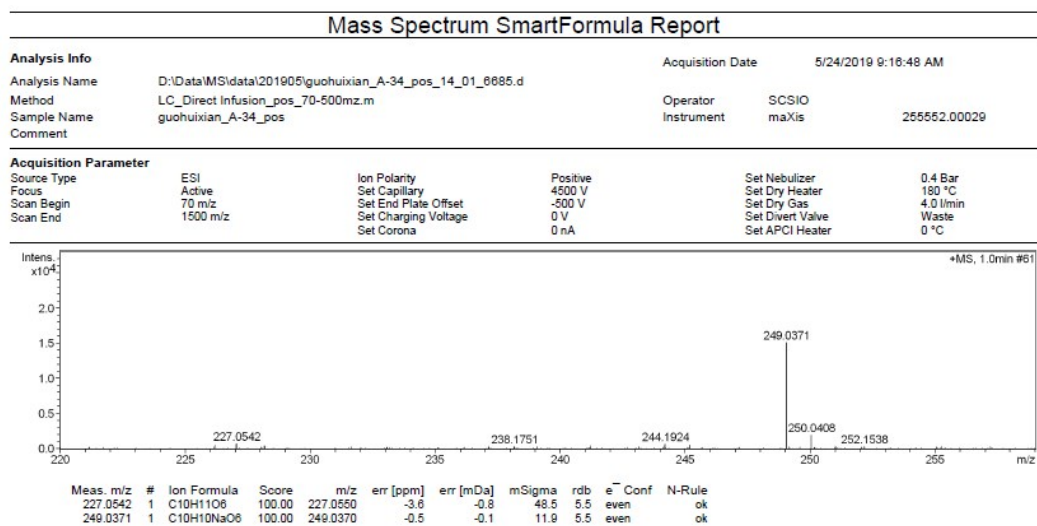

**Fig.S13.** HR-ESI-MS spectrum of compound (2)

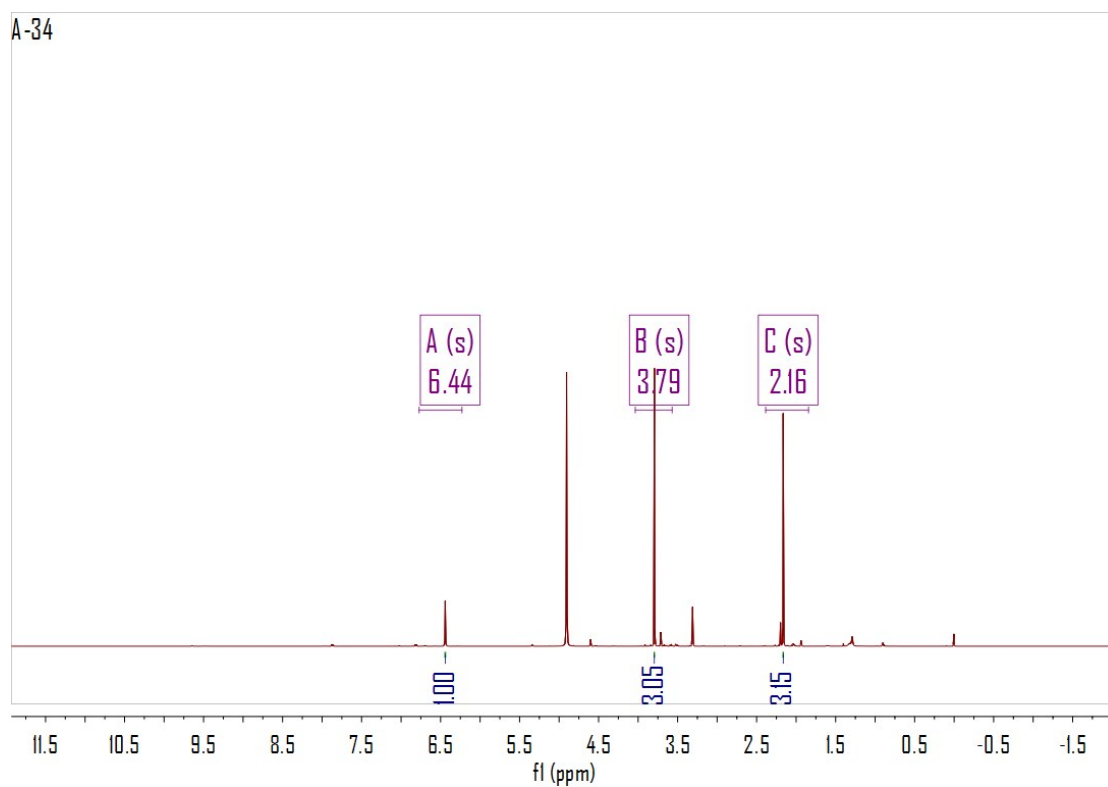

**Fig.S14.** <sup>1</sup>H- NMR spectrum (CD<sub>3</sub>OD, 600MHz) of compound (4)

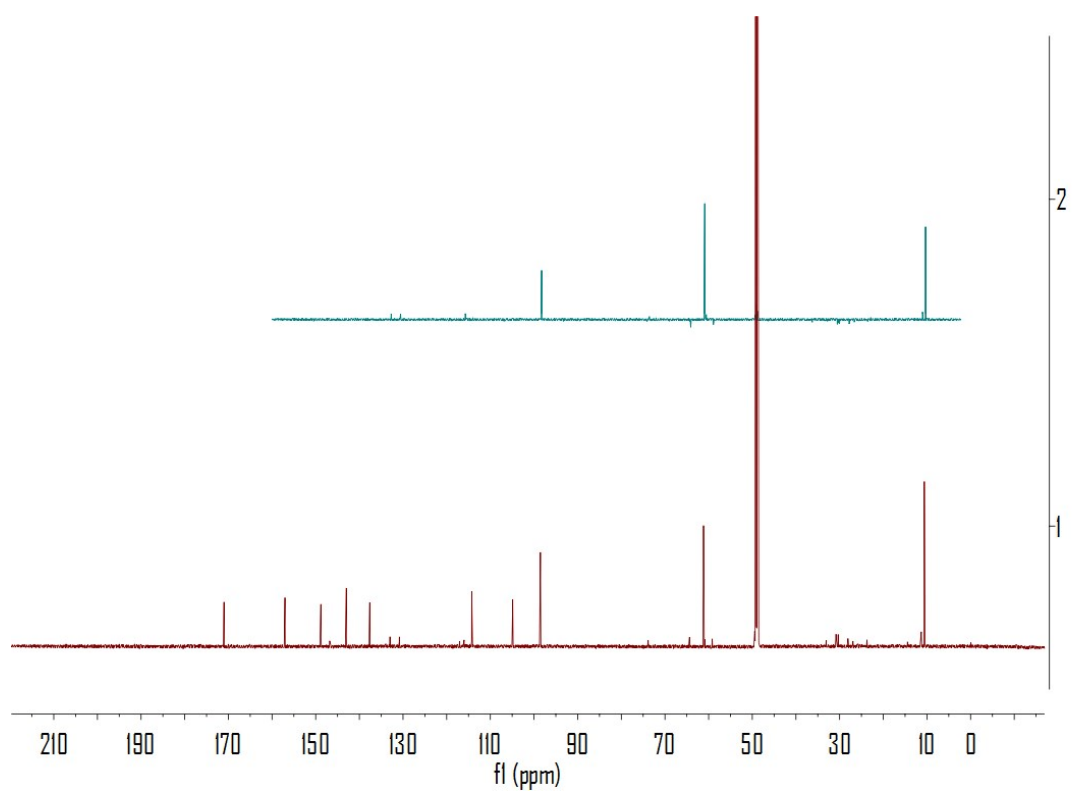

**Fig.S15.** DEPT 135 and  $^{13}\text{C}$ -NMR spectrum ( $\text{CD}_3\text{OD}$ , 150MHz) of compound (**4**)

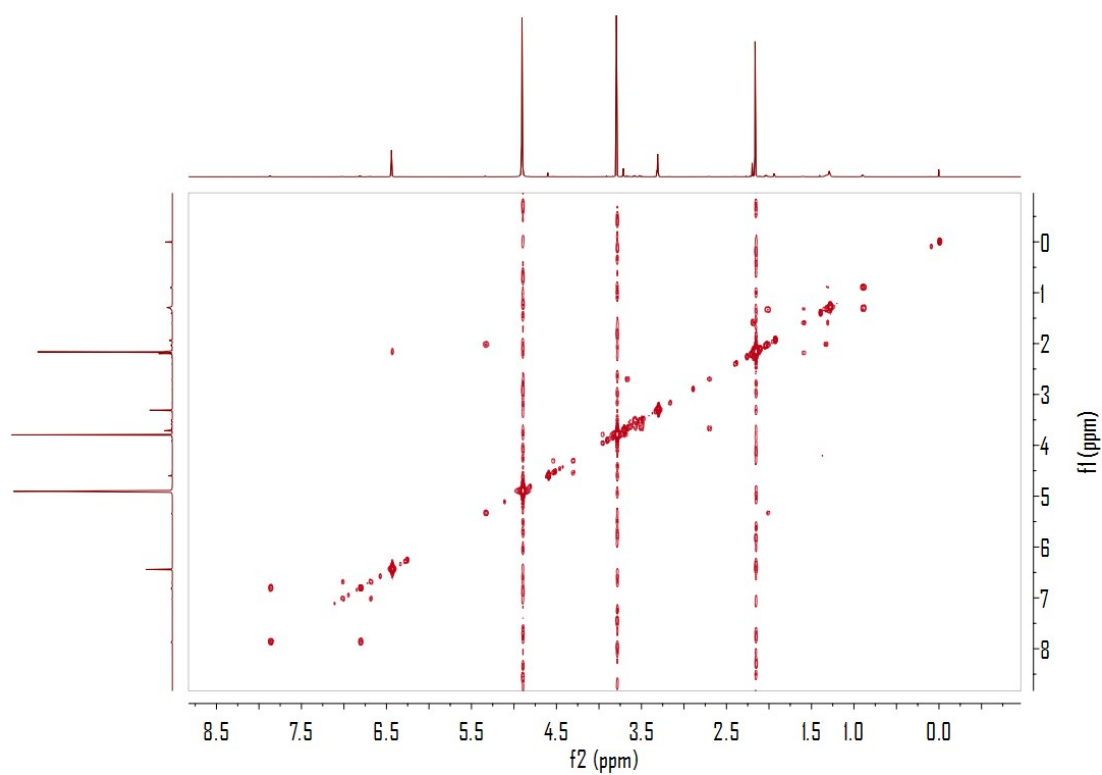

**Fig.S16.**  $^1\text{H}$ - $^1\text{H}$  COSY spectrum ( $\text{CD}_3\text{OD}$ , 600MHz) of compound (**4**)

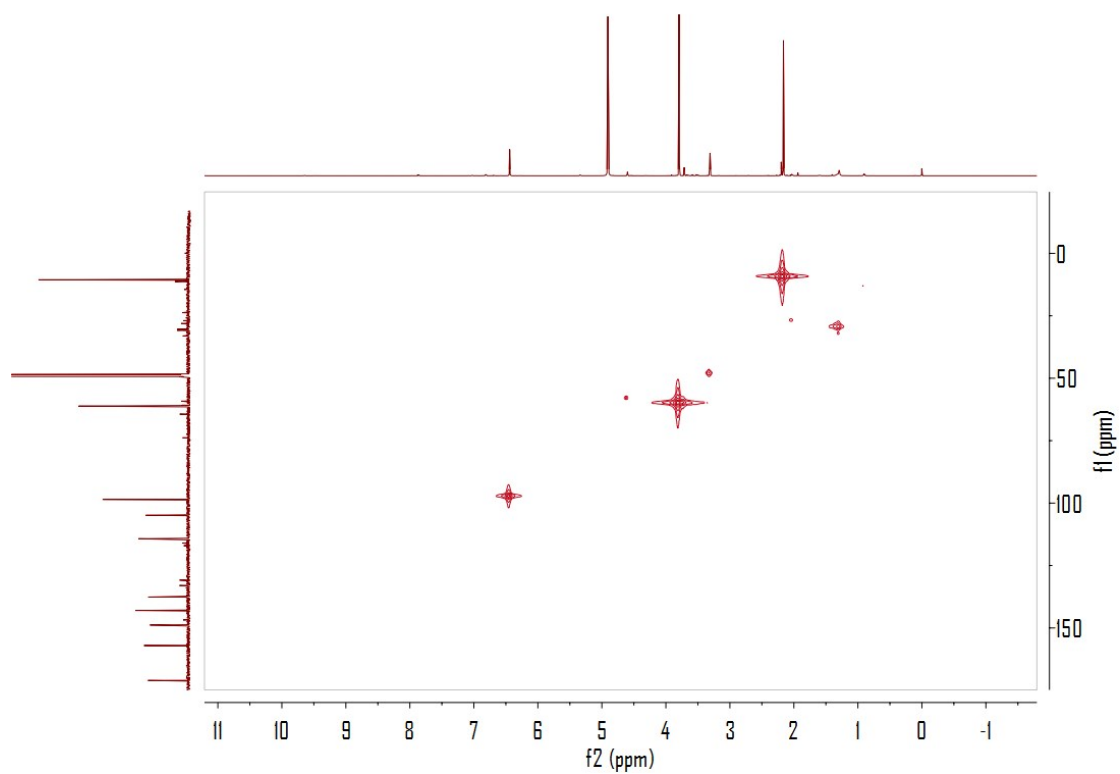

**Fig.S17.** HSQC spectrum (CD<sub>3</sub>OD, 600MHz) of compound **(4)**

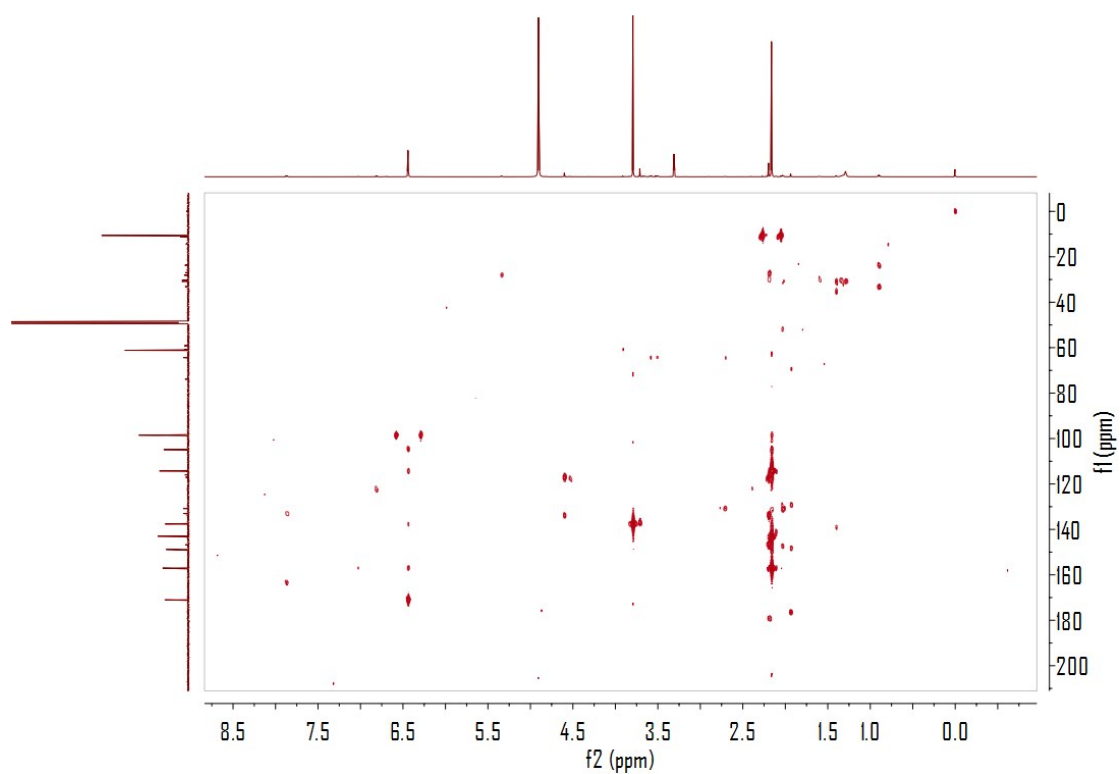

**Fig.S18.** HMBC spectrum (CD<sub>3</sub>OD, 600MHz) of compound **(2)**

**Table S1.** deviations in NMR data between natural and synthetic<sup>[1]</sup> samples of **1**

| No.   | $\delta_C$ , type<br>(N.S) | $\delta_C$ , type<br>(S.S) | $\Delta\delta$ /ppm | $\delta_C$ , type<br>(N.S)                                  | $\delta_C$ , type<br>(S.S)                                  | $\Delta\delta$ /ppm |
|-------|----------------------------|----------------------------|---------------------|-------------------------------------------------------------|-------------------------------------------------------------|---------------------|
| 1     | 51.3, C                    | 51.3, C                    | 0.0                 |                                                             |                                                             |                     |
| 2     | 66.4, CH <sub>2</sub>      | 66.4, CH <sub>2</sub>      | 0.0                 | 4.21, d, ( <i>J</i> = 10.1);<br>4.61, d, ( <i>J</i> = 10.1) | 4.22, d, ( <i>J</i> = 10.1);<br>4.61, d, ( <i>J</i> = 10.1) | +0.01               |
| 4     | 176.5, C                   | 176.4, C                   | -0.1                |                                                             |                                                             |                     |
| 5     | 60.1, C                    | 60.0, C                    | -0.1                |                                                             |                                                             |                     |
| 6     | 59.6, C                    | 59.6, C                    | 0.0                 |                                                             |                                                             |                     |
| 7     | 65.6, CH <sub>2</sub>      | 65.6, CH <sub>2</sub>      | 0.0                 | 3.74, d, ( <i>J</i> = 10.0);<br>3.82, d, ( <i>J</i> = 10.0) | 3.75, d, ( <i>J</i> = 10.0);<br>3.82, d, ( <i>J</i> = 10.0) | +0.01               |
| 9     | 67.8, CH <sub>2</sub>      | 67.8, CH <sub>2</sub>      | 0.0                 | 4.28, d, ( <i>J</i> = 16.1);<br>4.38, d, ( <i>J</i> = 16.1) | 4.29, d, ( <i>J</i> = 16.1);<br>4.38, d, ( <i>J</i> = 16.1) | +0.01               |
| 10    | 136.9, C                   | 136.9, C                   | 0.0                 |                                                             |                                                             |                     |
| 11    | 140.1, C                   | 140.1, C                   | 0.0                 |                                                             |                                                             |                     |
| 12    | 190.1, C                   | 190.9, C                   | +0.8                |                                                             |                                                             |                     |
| 13    | 69.1, CH                   | 69.1, CH                   | 0.0                 | 3.08, s                                                     | 3.08, s                                                     | 0.0                 |
| 14    | 88.4, C                    | 88.4, C                    | 0.0                 |                                                             |                                                             |                     |
| 15    | 193.3, C                   | 193.2, C                   | -0.1                |                                                             |                                                             |                     |
| 16    | 146.5, C                   | 146.4, C                   | -0.1                |                                                             |                                                             |                     |
| 17    | 134.7, C                   | 134.6, C                   | -0.1                |                                                             |                                                             |                     |
| 18    | 13.8, CH <sub>3</sub>      | 13.8, CH <sub>3</sub>      | 0.0                 | 1.96, s                                                     | 1.96, s                                                     | 0.0                 |
| 19    | 17.5, CH <sub>3</sub>      | 17.5, CH <sub>3</sub>      | 0.0                 | 1.03, s                                                     | 1.03, s                                                     | 0.0                 |
| 11-OH |                            |                            |                     | 8.97, s                                                     | 8.93, s                                                     | -0.04               |
| 14-OH |                            |                            |                     | 6.27, s                                                     | 6.24, s                                                     | +0.03               |
| 16-OH |                            |                            |                     | 8.84, s                                                     | 8.93, s                                                     | +0.09               |

N.S: natural sample; S.S: synthetic sample.

**Table S2.** ECD Computational Result.**S2.1** Gibbs free energies and Boltzmann-population of low-energy conformers of **1R,5R,6S,13R,14R-1**

| Conformers of <b>1R,5R,6S,13R,14R-1</b> | In MeOH      |                    |
|-----------------------------------------|--------------|--------------------|
|                                         | $\Delta G^a$ | P (%) <sup>b</sup> |
| <b>1a</b>                               | 0.0          | 83.3               |
| <b>1b</b>                               | 2.12         | 3.6                |
| <b>1c</b>                               | 2.62         | 5.7                |
| <b>1d</b>                               | 3.12         | 7.4                |

$\Delta G^a$ , B3LYP/ 6-31+G (d, p), in kcal/mol. <sup>b</sup>Boltzmann-population.

**S2.2** Cartesian coordinates for the low-energy optimized conformers of **3R-1** at B3LYP/6-31+G (d, p) level of theory in MeOH.

| Conformer <b>1a</b> |      | Standard Orientation(Ångstroms) |           |           |           |
|---------------------|------|---------------------------------|-----------|-----------|-----------|
| Center Number       | Atom | Type                            | X         | Y         | Z         |
| 1                   | 6    | 0                               | -2.241719 | -0.288180 | -1.025922 |
| 2                   | 6    | 0                               | -1.814560 | 0.896912  | -0.207483 |
| 3                   | 6    | 0                               | -0.476924 | 0.740643  | 0.633543  |
| 4                   | 6    | 0                               | 0.191382  | 1.062678  | -0.746580 |
| 5                   | 6    | 0                               | 0.336929  | -0.354079 | -1.347946 |
| 6                   | 6    | 0                               | -1.031004 | -0.932142 | -1.727269 |

|    |   |   |           |           |           |
|----|---|---|-----------|-----------|-----------|
| 7  | 6 | 0 | 1.506639  | 1.777816  | -0.753392 |
| 8  | 6 | 0 | 2.681302  | 0.868296  | -0.366537 |
| 9  | 6 | 0 | 2.448892  | -0.524237 | -0.081031 |
| 10 | 6 | 0 | 1.038103  | -1.073752 | -0.137304 |
| 11 | 8 | 0 | 1.657428  | 2.975606  | -1.001391 |
| 12 | 8 | 0 | -3.399717 | -0.665895 | -1.196925 |
| 13 | 8 | 0 | -1.150418 | -1.857996 | -2.531923 |
| 14 | 6 | 0 | 0.882776  | -2.607136 | -0.138346 |
| 15 | 8 | 0 | -0.419380 | -2.868273 | 0.517749  |
| 16 | 6 | 0 | -0.877232 | -1.759916 | 1.209259  |
| 17 | 6 | 0 | 0.131598  | -0.612934 | 1.098058  |
| 18 | 6 | 0 | -2.762389 | 1.732246  | 0.598435  |
| 19 | 8 | 0 | -1.879635 | 2.596303  | 1.379470  |
| 20 | 8 | 0 | -1.031106 | 1.722086  | -1.243217 |
| 21 | 8 | 0 | 3.847180  | 1.376609  | -0.296367 |
| 22 | 6 | 0 | 3.619912  | -1.386728 | 0.266283  |
| 23 | 8 | 0 | -1.933560 | -1.748996 | 1.828067  |
| 24 | 6 | 0 | 0.892304  | -0.545569 | 2.443353  |
| 25 | 6 | 0 | -0.637269 | 1.878822  | 1.671805  |
| 26 | 1 | 0 | 0.966148  | -0.389753 | -2.241604 |
| 27 | 1 | 0 | 0.815450  | -3.037213 | -1.138068 |
| 28 | 1 | 0 | 1.651279  | -3.119785 | 0.441758  |
| 29 | 1 | 0 | -3.376921 | 1.088117  | 1.241320  |
| 30 | 1 | 0 | -3.399198 | 2.375262  | -0.008858 |
| 31 | 1 | 0 | 3.743664  | -2.203417 | -0.459599 |
| 32 | 1 | 0 | 4.531413  | -0.787445 | 0.273076  |
| 33 | 1 | 0 | 3.500204  | -1.859907 | 1.250797  |
| 34 | 1 | 0 | 1.439420  | -1.477079 | 2.621811  |
| 35 | 1 | 0 | 1.609312  | 0.280515  | 2.459315  |
| 36 | 1 | 0 | 0.188620  | -0.418523 | 3.269954  |
| 37 | 1 | 0 | -0.693546 | 1.458534  | 2.680429  |
| 38 | 1 | 0 | 0.165374  | 2.618702  | 1.632425  |

| Conformer <b>1b</b> |      | Standard Orientation(Ångstroms) |           |           |           |
|---------------------|------|---------------------------------|-----------|-----------|-----------|
| Center Number       | Atom | Type                            | X         | Y         | Z         |
| 1                   | 6    | 0                               | -2.241719 | -0.288180 | -1.025922 |
| 2                   | 6    | 0                               | -1.814560 | 0.896912  | -0.207483 |
| 3                   | 6    | 0                               | -0.476924 | 0.740643  | 0.633543  |
| 4                   | 6    | 0                               | 0.191382  | 1.062678  | -0.746580 |
| 5                   | 6    | 0                               | 0.336929  | -0.354079 | -1.347946 |
| 6                   | 6    | 0                               | -1.031004 | -0.932142 | -1.727269 |
| 7                   | 6    | 0                               | 1.506639  | 1.777816  | -0.753392 |
| 8                   | 6    | 0                               | 2.681302  | 0.868296  | -0.366537 |
| 9                   | 6    | 0                               | 2.448892  | -0.524237 | -0.081031 |
| 10                  | 6    | 0                               | 1.038103  | -1.073752 | -0.137304 |

|    |   |   |           |           |           |
|----|---|---|-----------|-----------|-----------|
| 11 | 8 | 0 | 1.657428  | 2.975606  | -1.001391 |
| 12 | 8 | 0 | -3.399717 | -0.665895 | -1.196925 |
| 13 | 8 | 0 | -1.150418 | -1.857996 | -2.531923 |
| 14 | 6 | 0 | 0.882776  | -2.607136 | -0.138346 |
| 15 | 8 | 0 | -0.419380 | -2.868273 | 0.517749  |
| 16 | 6 | 0 | -0.877232 | -1.759916 | 1.209259  |
| 17 | 6 | 0 | 0.131598  | -0.612934 | 1.098058  |
| 18 | 6 | 0 | -2.762389 | 1.732246  | 0.598435  |
| 19 | 8 | 0 | -1.879635 | 2.596303  | 1.379470  |
| 20 | 8 | 0 | -1.031106 | 1.722086  | -1.243217 |
| 21 | 8 | 0 | 3.847180  | 1.376609  | -0.296367 |
| 22 | 6 | 0 | 3.619912  | -1.386728 | 0.266283  |
| 23 | 8 | 0 | -1.933560 | -1.748996 | 1.828067  |
| 24 | 6 | 0 | 0.892304  | -0.545569 | 2.443353  |
| 25 | 6 | 0 | -0.637269 | 1.878822  | 1.671805  |
| 26 | 1 | 0 | 0.966148  | -0.389753 | -2.241604 |
| 27 | 1 | 0 | 0.815450  | -3.037213 | -1.138068 |
| 28 | 1 | 0 | 1.651279  | -3.119785 | 0.441758  |
| 29 | 1 | 0 | -3.376921 | 1.088117  | 1.241320  |
| 30 | 1 | 0 | -3.399198 | 2.375262  | -0.008858 |
| 31 | 1 | 0 | 3.743664  | -2.203417 | -0.459599 |
| 32 | 1 | 0 | 4.531413  | -0.787445 | 0.273076  |
| 33 | 1 | 0 | 3.500204  | -1.859907 | 1.250797  |
| 34 | 1 | 0 | 1.439420  | -1.477079 | 2.621811  |
| 35 | 1 | 0 | 1.609312  | 0.280515  | 2.459315  |
| 36 | 1 | 0 | 0.188620  | -0.418523 | 3.269954  |
| 37 | 1 | 0 | -0.693546 | 1.458534  | 2.680429  |
| 38 | 1 | 0 | 0.165374  | 2.618702  | 1.632425  |

| Conformer 1c  |      | Standard Orientation(Ångstroms) |           |           |           |
|---------------|------|---------------------------------|-----------|-----------|-----------|
| Center Number | Atom | Type                            | X         | Y         | Z         |
| 1             | 6    | 0                               | -2.241719 | -0.288180 | -1.025922 |
| 2             | 6    | 0                               | -1.814560 | 0.896912  | -0.207483 |
| 3             | 6    | 0                               | -0.476924 | 0.740643  | 0.633543  |
| 4             | 6    | 0                               | 0.191382  | 1.062678  | -0.746580 |
| 5             | 6    | 0                               | 0.336929  | -0.354079 | -1.347946 |
| 6             | 6    | 0                               | -1.031004 | -0.932142 | -1.727269 |
| 7             | 6    | 0                               | 1.506639  | 1.777816  | -0.753392 |
| 8             | 6    | 0                               | 2.681302  | 0.868296  | -0.366537 |
| 9             | 6    | 0                               | 2.448892  | -0.524237 | -0.081031 |
| 10            | 6    | 0                               | 1.038103  | -1.073752 | -0.137304 |
| 11            | 8    | 0                               | 1.657428  | 2.975606  | -1.001391 |
| 12            | 8    | 0                               | -3.399717 | -0.665895 | -1.196925 |
| 13            | 8    | 0                               | -1.150418 | -1.857996 | -2.531923 |
| 14            | 6    | 0                               | 0.882776  | -2.607136 | -0.138346 |
| 15            | 8    | 0                               | -0.419380 | -2.868273 | 0.517749  |

|    |   |   |           |           |           |
|----|---|---|-----------|-----------|-----------|
| 16 | 6 | 0 | -0.877232 | -1.759916 | 1.209259  |
| 17 | 6 | 0 | 0.131598  | -0.612934 | 1.098058  |
| 18 | 6 | 0 | -2.762389 | 1.732246  | 0.598435  |
| 19 | 8 | 0 | -1.879635 | 2.596303  | 1.379470  |
| 20 | 8 | 0 | -1.031106 | 1.722086  | -1.243217 |
| 21 | 8 | 0 | 3.847180  | 1.376609  | -0.296367 |
| 22 | 6 | 0 | 3.619912  | -1.386728 | 0.266283  |
| 23 | 8 | 0 | -1.933560 | -1.748996 | 1.828067  |
| 24 | 6 | 0 | 0.892304  | -0.545569 | 2.443353  |
| 25 | 6 | 0 | -0.637269 | 1.878822  | 1.671805  |
| 26 | 1 | 0 | 0.966148  | -0.389753 | -2.241604 |
| 27 | 1 | 0 | 0.815450  | -3.037213 | -1.138068 |
| 28 | 1 | 0 | 1.651279  | -3.119785 | 0.441758  |
| 29 | 1 | 0 | -3.376921 | 1.088117  | 1.241320  |
| 30 | 1 | 0 | -3.399198 | 2.375262  | -0.008858 |
| 31 | 1 | 0 | 3.743664  | -2.203417 | -0.459599 |
| 32 | 1 | 0 | 4.531413  | -0.787445 | 0.273076  |
| 33 | 1 | 0 | 3.500204  | -1.859907 | 1.250797  |
| 34 | 1 | 0 | 1.439420  | -1.477079 | 2.621811  |
| 35 | 1 | 0 | 1.609312  | 0.280515  | 2.459315  |
| 36 | 1 | 0 | 0.188620  | -0.418523 | 3.269954  |
| 37 | 1 | 0 | -0.693546 | 1.458534  | 2.680429  |
| 38 | 1 | 0 | 0.165374  | 2.618702  | 1.632425  |

| Conformer 1d  |      | Standard Orientation(Ångstroms) |           |           |           |
|---------------|------|---------------------------------|-----------|-----------|-----------|
| Center Number | Atom | Type                            | X         | Y         | Z         |
| 1             | 6    | 0                               | -2.241719 | -0.288180 | -1.025922 |
| 2             | 6    | 0                               | -1.814560 | 0.896912  | -0.207483 |
| 3             | 6    | 0                               | -0.476924 | 0.740643  | 0.633543  |
| 4             | 6    | 0                               | 0.191382  | 1.062678  | -0.746580 |
| 5             | 6    | 0                               | 0.336929  | -0.354079 | -1.347946 |
| 6             | 6    | 0                               | -1.031004 | -0.932142 | -1.727269 |
| 7             | 6    | 0                               | 1.506639  | 1.777816  | -0.753392 |
| 8             | 6    | 0                               | 2.681302  | 0.868296  | -0.366537 |
| 9             | 6    | 0                               | 2.448892  | -0.524237 | -0.081031 |
| 10            | 6    | 0                               | 1.038103  | -1.073752 | -0.137304 |
| 11            | 8    | 0                               | 1.657428  | 2.975606  | -1.001391 |
| 12            | 8    | 0                               | -3.399717 | -0.665895 | -1.196925 |
| 13            | 8    | 0                               | -1.150418 | -1.857996 | -2.531923 |
| 14            | 6    | 0                               | 0.882776  | -2.607136 | -0.138346 |
| 15            | 8    | 0                               | -0.419380 | -2.868273 | 0.517749  |
| 16            | 6    | 0                               | -0.877232 | -1.759916 | 1.209259  |
| 17            | 6    | 0                               | 0.131598  | -0.612934 | 1.098058  |
| 18            | 6    | 0                               | -2.762389 | 1.732246  | 0.598435  |
| 19            | 8    | 0                               | -1.879635 | 2.596303  | 1.379470  |

|    |   |   |           |           |           |
|----|---|---|-----------|-----------|-----------|
| 20 | 8 | 0 | -1.031106 | 1.722086  | -1.243217 |
| 21 | 8 | 0 | 3.847180  | 1.376609  | -0.296367 |
| 22 | 6 | 0 | 3.619912  | -1.386728 | 0.266283  |
| 23 | 8 | 0 | -1.933560 | -1.748996 | 1.828067  |
| 24 | 6 | 0 | 0.892304  | -0.545569 | 2.443353  |
| 25 | 6 | 0 | -0.637269 | 1.878822  | 1.671805  |
| 26 | 1 | 0 | 0.966148  | -0.389753 | -2.241604 |
| 27 | 1 | 0 | 0.815450  | -3.037213 | -1.138068 |
| 28 | 1 | 0 | 1.651279  | -3.119785 | 0.441758  |
| 29 | 1 | 0 | -3.376921 | 1.088117  | 1.241320  |
| 30 | 1 | 0 | -3.399198 | 2.375262  | -0.008858 |
| 31 | 1 | 0 | 3.743664  | -2.203417 | -0.459599 |
| 32 | 1 | 0 | 4.531413  | -0.787445 | 0.273076  |
| 33 | 1 | 0 | 3.500204  | -1.859907 | 1.250797  |
| 34 | 1 | 0 | 1.439420  | -1.477079 | 2.621811  |
| 35 | 1 | 0 | 1.609312  | 0.280515  | 2.459315  |
| 36 | 1 | 0 | 0.188620  | -0.418523 | 3.269954  |
| 37 | 1 | 0 | -0.693546 | 1.458534  | 2.680429  |
| 38 | 1 | 0 | 0.165374  | 2.618702  | 1.632425  |

## References

- [1] Ellerbrock, P.; Armanino, N.; Ilg, M. K.; Webster, R.; & Trauner, D. An eight-step synthesis of Epicolactone reveals its biosynthetic origin. *Nature Chemistry*. **2015**, 7(11), 879-882.
